# Supplementary material for: Gefitinib salts/cocrystals with phenolic acids as a promising solid-state approach to improve solubility
Source: Royal Society of Chemistry journal article supplement (doi:10.1039/d4ce00039k), 2024-01-01
Supplement: d4ce00039k1.pdf [file d4ce00039k1.pdf]

## *Supporting information*

### **Gefitinib salt/cocrystal with phenolic acids as promising solid–state approach to improve solubility**

Yao Zou,<sup>a</sup> Xin Meng,<sup>a</sup> Baoxi Zhang,<sup>a</sup> Hongmei Yu,<sup>a</sup> Guorong He,<sup>b</sup> Ningbo Gong,<sup>\*a</sup> Yang Lu,<sup>\*a</sup> and Guanhua Du<sup>b</sup>

<sup>a</sup> Beijing Key Laboratory of Polymorphic Drugs, Institute of Materia Medica, Chinese Academy of Medical Sciences and Peking Union Medical College, Beijing 100050, China

<sup>b</sup> Beijing City Key Laboratory of Drug Target Identification and Drug Screening, Institute of Materia Medica, Chinese Academy of Medical Sciences and Peking Union Medical College, Beijing 100050, China.

#### **Table and Figure of Contents**

Table S1. Hydrogen bond geometrical parameters of crystal structures.

Fig. S1 The DSC thermograms of CCFs.

Fig. S2 FT–IR spectra of GEF, CCFs, and the corresponding synthesized salts/cocrystals.

Fig. S3 Accelerated stability results of (a) GEF, (b) GEF–3–HBA, (c) GEF–FA, (d) GEF–4–HBA, (e) GEF–35DNB, (f) GEF–SA.

Fig. S4 The PRXD patterns of GEF, GEF–3–HBA, GEF–FA, GEF–4–HBA, GEF–35DNB and GEF–SA before and after dissolution experiment.

**Table S1.** Hydrogen bond geometrical parameters of crystal structures.

| Connection                                                | D $\cdots$ H/ Å | H $\cdots$ A/ Å | D $\cdots$ A/ Å | $\angle$ (DHA)/ ° | Symmetry             |
|-----------------------------------------------------------|-----------------|-----------------|-----------------|-------------------|----------------------|
| <b>GEF-3-HBA</b>                                          |                 |                 |                 |                   |                      |
| N <sub>1</sub> -H <sub>1</sub> $\cdots$ O <sub>4</sub>    | 0.86            | 2.32            | 3.143           | 159               | [x, y, z]            |
| N <sub>4</sub> -H <sub>4</sub> $\cdots$ O <sub>5</sub>    | 1.04            | 1.54            | 2.575           | 172               | [x-1, y, z]          |
| O <sub>6</sub> -H <sub>6</sub> $\cdots$ N <sub>3</sub>    | 0.82            | 1.92            | 2.715           | 164               | [x, -y+3/2, z+1/2]   |
| <b>GEF-FA</b>                                             |                 |                 |                 |                   |                      |
| N <sub>1</sub> -H <sub>1</sub> $\cdots$ O <sub>6</sub>    | 0.86            | 2.20            | 3.011           | 157               | [x, -y+1/2, z+1/2]   |
| N <sub>4</sub> -H <sub>4</sub> $\cdots$ O <sub>7</sub>    | 1.03            | 1.55            | 2.565           | 169               | [x, y, z]            |
| O <sub>4</sub> -H <sub>4B</sub> $\cdots$ N <sub>3</sub>   | 0.82            | 2.07            | 2.874           | 165               | [-x+1, -y+1, -z]     |
| <b>GEF-4-HBA</b>                                          |                 |                 |                 |                   |                      |
| N <sub>1</sub> -H <sub>1a</sub> $\cdots$ O <sub>4</sub>   | 0.88            | 2.19            | 3.008           | 155               | [1+x, y-1, z]        |
| N <sub>1</sub> -H <sub>1b</sub> $\cdots$ O <sub>6</sub>   | 0.88            | 2.15            | 2.888           | 141               | [1-x, y-1, -z+1]     |
| O <sub>5</sub> -H <sub>5b</sub> $\cdots$ N <sub>3</sub>   | 0.84            | 1.68            | 2.492           | 161               | [-x, -y+2, -z+1]     |
| O <sub>6</sub> -H <sub>6</sub> $\cdots$ N <sub>3</sub>    | 0.84            | 1.91            | 2.667           | 149               | [x, y, z]            |
| <b>GEF-35DNB</b>                                          |                 |                 |                 |                   |                      |
| N <sub>1</sub> -H <sub>1</sub> $\cdots$ O <sub>6</sub>    | 0.86            | 2.00            | 2.850           | 170               | [x, y, z]            |
| N <sub>4</sub> -H <sub>4</sub> $\cdots$ O <sub>7</sub>    | 0.98            | 1.72            | 2.678           | 166               | [x, y, z]            |
| O <sub>11</sub> -H <sub>11A</sub> $\cdots$ N <sub>3</sub> | 0.82            | 1.72            | 2.505           | 158               | [x, y, z]            |
| <b>GEF-SA</b>                                             |                 |                 |                 |                   |                      |
| N <sub>1A</sub> -H <sub>1A</sub> $\cdots$ O <sub>4C</sub> | 0.86            | 1.99            | 2.818           | 160               | [x, y, z]            |
| N <sub>1B</sub> -H <sub>1B</sub> $\cdots$ O <sub>5C</sub> | 0.86            | 2.00            | 2.832           | 162               | [x, y, z]            |
| N <sub>3B</sub> -H <sub>3B</sub> $\cdots$ O <sub>4A</sub> | 0.86            | 1.84            | 2.700           | 174               | [1/2-x, 1-y, -1/2+z] |
| N <sub>4A</sub> -H <sub>4A</sub> $\cdots$ O <sub>5A</sub> | 0.98            | 1.81            | 2.778           | 170               | [1-x, 1/2+y, 1/2-z]  |
| N <sub>4B</sub> -H <sub>4B</sub> $\cdots$ O <sub>4B</sub> | 0.98            | 1.74            | 2.695           | 165               | [x, y, z]            |
| O <sub>5D</sub> -H <sub>5D</sub> $\cdots$ N <sub>3A</sub> | 0.82            | 1.95            | 2.732           | 159               | [1/2+x, 3/2-y, -z]   |
| O <sub>6A</sub> -H <sub>6A</sub> $\cdots$ O <sub>5A</sub> | 0.82            | 1.92            | 2.622           | 143               | [x, y, z]            |
| O <sub>6B</sub> -H <sub>6B</sub> $\cdots$ O <sub>5B</sub> | 0.82            | 1.79            | 2.502           | 145               | [x, y, z]            |
| O <sub>6C</sub> -H <sub>6C</sub> $\cdots$ O <sub>5C</sub> | 0.82            | 1.82            | 2.542           | 146               | [x, y, z]            |
| O <sub>6D</sub> -H <sub>6D</sub> $\cdots$ O <sub>4D</sub> | 0.82            | 1.78            | 2.505           | 146               | [x, y, z]            |

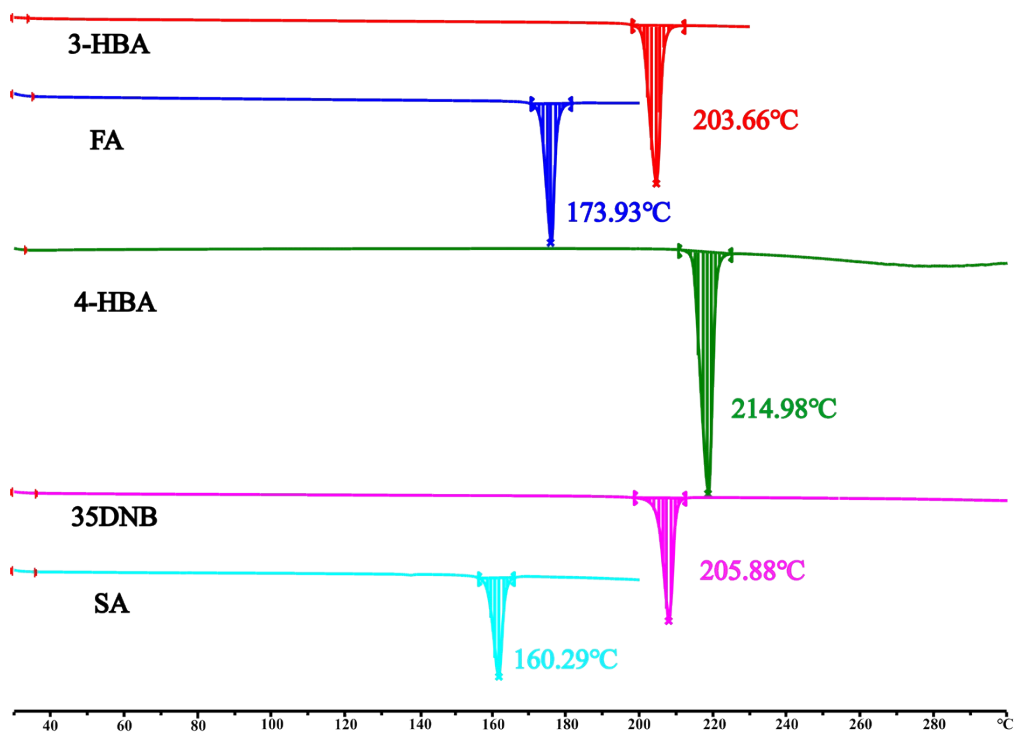

Fig. S1 The DSC thermograms of CCFs used in this study.

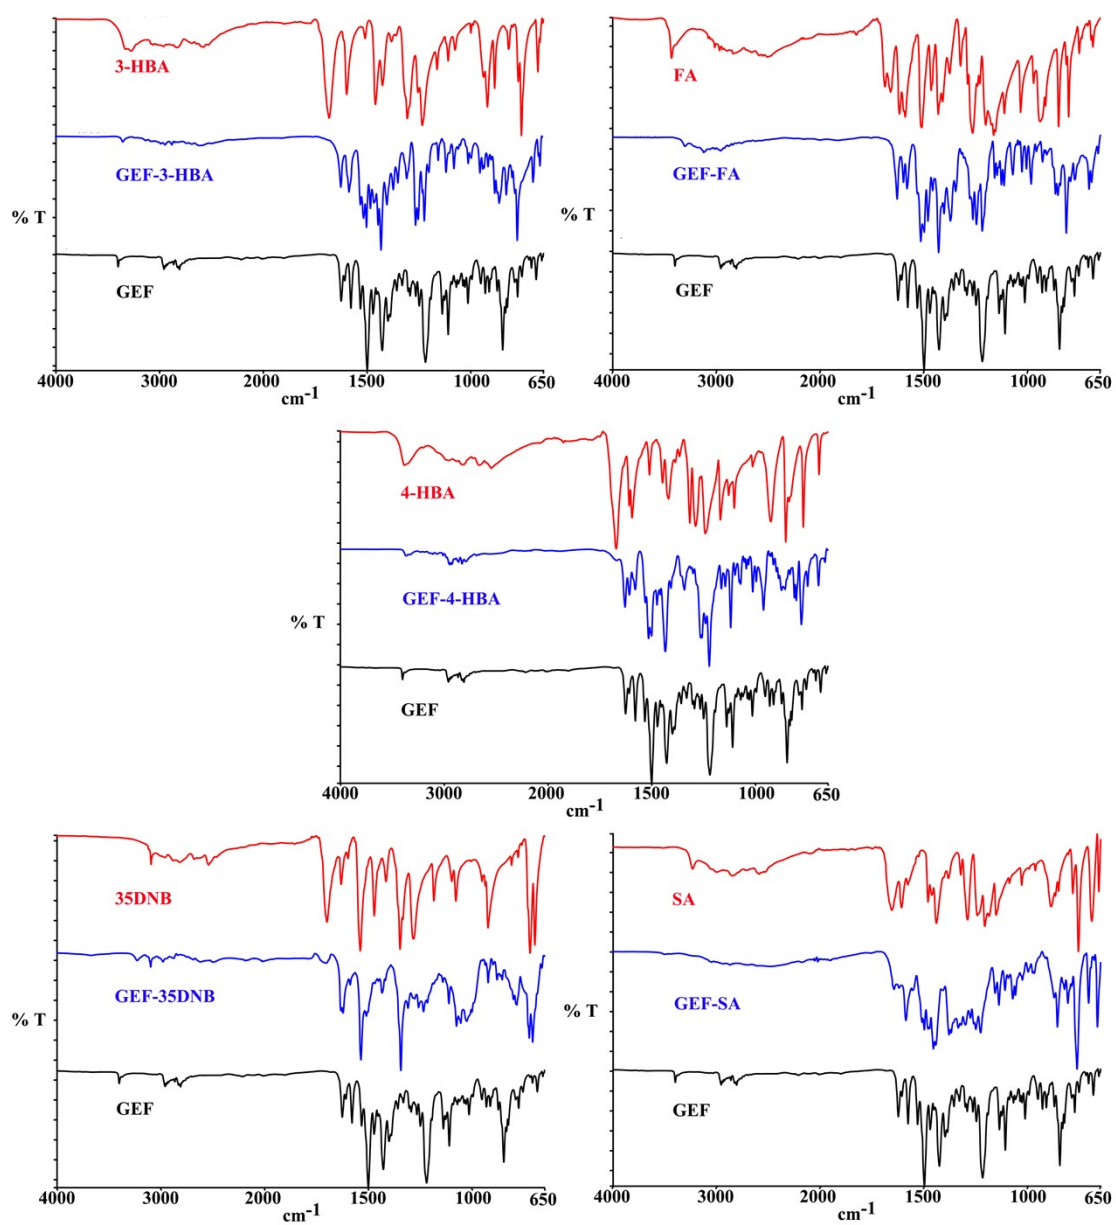

**Fig. S2** FT-IR spectra of GEF, CCFs, and the corresponding salts/cocrystals.

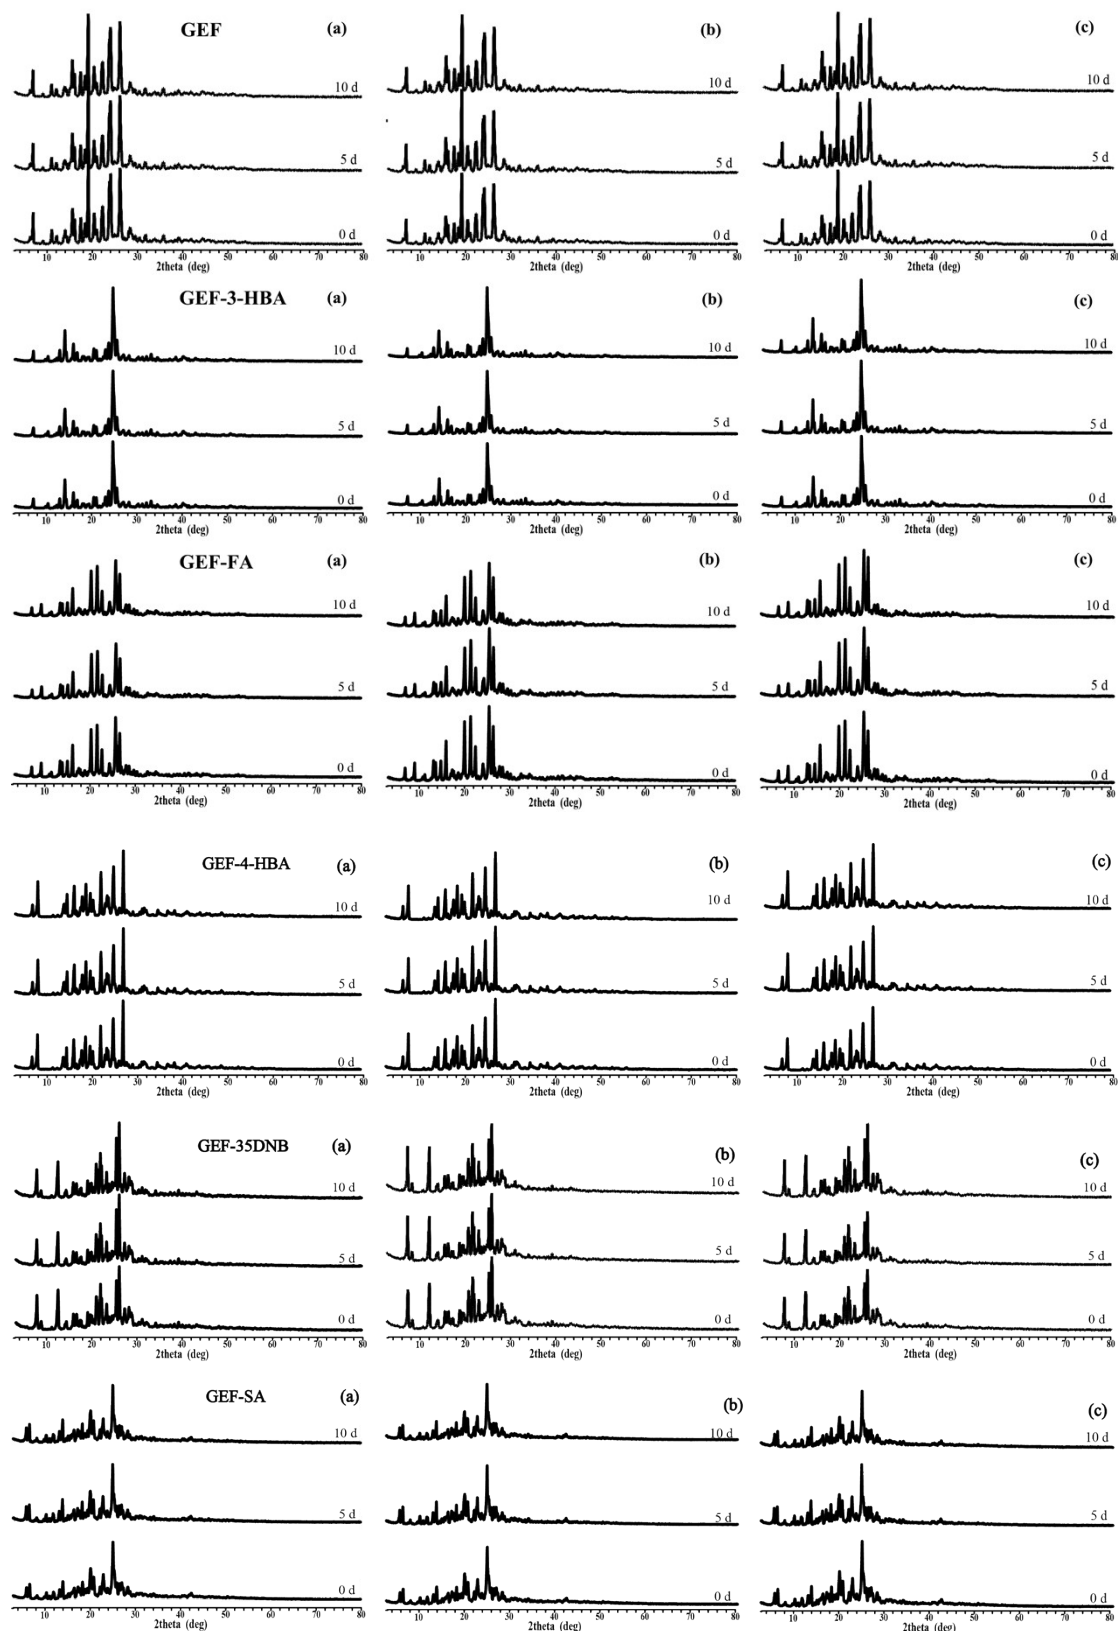

**Fig. S3** Accelerated stability results of GEF, GEF-3-HBA, GEF-FA, GEF-4-HBA, GEF-35DNB and GEF-SA. (a) high temperature ( $60 \pm 1$  °C); (b) high humidity ( $90 \pm 5\%$ , 25 °C); (c) illumination ( $4500 \pm 500$  lx, 25 °C)

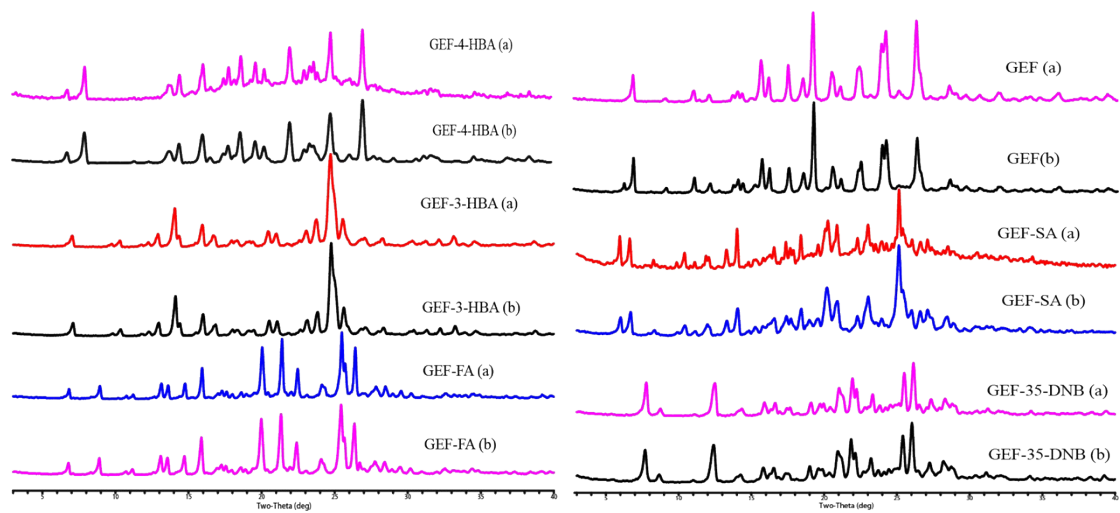

**Fig. S4** The PRXD patterns of GEF, GEF-3-HBA, GEF-FA, GEF-4-HBA, GEF-35DNB and GEF-SA before and after dissolution experiment (a)the initial phases; (b) the bottom phases.
